# Supplementary material
Source: PubMed Central journal article supplement (PMC2206592)
Supplement: pnas_0707486105_3.pdf [file pnas_0707486105_3.pdf]

**Table 3.** Frequency of expression patterns of mammary gland-specific genes in MECs and CD80<sup>hi</sup> mTECs\*

| Csna | Csnb | Csng | Csnd | Csnk | Lalba                 | WAP  | Elf5 | MEC | mTEC<br>CD80hi |
|------|------|------|------|------|-----------------------|------|------|-----|----------------|
| +    | +    | +    | +    | +    | +                     | +    | +    | 56  | 0              |
| +    | +    | +    | +    | +    | +                     | +    | -    | 12  | 0              |
| +    | +    | +    | +    | +    | +                     | -    | -    | 1   | 0              |
| +    | +    | +    | +    | +    | +                     | n.a. | n.a. | 151 | 0              |
| +    | +    | +    | +    | +    | -                     | n.a. | n.a. | 4   | 0              |
| +    | +    | +    | +    | +    | -                     | +    | -    | 0   | 1              |
| +    | +    | +    | -    | +    | +                     | n.a. | n.a. | 3   | 0              |
| +    | +    | +    | -    | +    | +                     | +    | +    | 2   | 0              |
| +    | +    | +    | -    | +    | +                     | +    | -    | 2   | 0              |
| +    | +    | +    | -    | +    | +                     | -    | +    | 1   | 0              |
| +    | +    | -    | +    | +    | +                     | n.a. | n.a. | 2   | 0              |
| +    | +    | +    | -    | +    | -                     | n.a. | n.a. | 2   | 1              |
| +    | +    | +    | -    | +    | -                     | +    | +    | 0   | 1              |
| +    | +    | +    | -    | -    | +                     | n.a. | n.a. | 1   | 0              |
| +    | +    | -    | +    | +    | -                     | n.a. | n.a. | 2   | 0              |
| +    | +    | -    | -    | +    | +                     | n.a. | n.a. | 3   | 0              |
| -    | +    | +    | +    | +    | -                     | n.a. | n.a. | 0   | 1              |
|      |      |      |      |      | Σ:                    |      |      | 242 | 4              |
|      |      |      |      |      | Total cells analyzed: |      |      | 263 | 747            |

\*Not all combinations shown in Fig. 2 are listed here.

n.a., not analyzed.
