# Supplementary material
Source: PubMed Central journal article supplement (PMC2206592)
Supplement: pnas_0707486105_4.pdf [file pnas_0707486105_4.pdf]

**Table 4.** Correlation analysis of gene expression in CD80<sup>lo</sup> mTECs as detected by single-cell PCR

|         | Sult1d1 | Csna    | Csnb    | Csng  | Csnd | Odam    | Csnk | Lalba | WAP  | Elf5 |
|---------|---------|---------|---------|-------|------|---------|------|-------|------|------|
| Sult1d1 | -       | -0.0163 | 0.0909  | n.c.* | n.c. | -0.0163 | n.c. | n.c.  | n.a. | n.a. |
| Csna    |         | -       | -0.0185 | n.c.  | n.c. | -0.0101 | n.c. | n.c.  | n.a. | n.a. |
| Csnb    |         |         | -       | n.c.  | n.c. | -0.0185 | n.c. | n.c.  | n.a. | n.a. |
| Csng    |         |         |         | -     | n.c. | n.c.    | n.c. | n.c.  | n.a. | n.a. |
| Csnd    |         |         |         |       | -    | n.c.    | n.c. | n.c.  | n.a. | n.a. |
| Odam    |         |         |         |       |      | -       | n.c. | n.c.  | n.a. | n.a. |
| Csnk    |         |         |         |       |      |         | -    | n.c.  | n.a. | n.a. |
| Lalba   |         |         |         |       |      |         |      | -     | n.a. | n.a. |
| WAP     |         |         |         |       |      |         |      |       | -    | n.a. |
| Elf5    |         |         |         |       |      |         |      |       |      | -    |

\*κ Not calculated, because one of the analyzed genes was not expressed.

n.a., not analyzed.
