# Supplementary material
Source: PubMed Central journal article supplement (PMC2206592)
Supplement: pnas_0707486105_5.pdf [file pnas_0707486105_5.pdf]

**Table 5.** Correlation analysis of gene expression in Aire KO mTEC CD80<sup>hi</sup> as detected by single-cell PCR

|         | Sult1d1 | Csna    | Csnb   | Csng    | Csnd    | Odam    | Csnk    | Lalba   | WAP  | Elf5 |
|---------|---------|---------|--------|---------|---------|---------|---------|---------|------|------|
| Sult1d1 | -       | -0.0105 | 0.0023 | -0.0105 | -0.0348 | -0.0105 | 0.0200  | -0.0055 | n.a. | n.a. |
| Csna    |         | -       | 0.0003 | -0.0059 | -0.0096 | -0.0059 | 0.0268  | -0.0039 | n.a. | n.a. |
| Csnb    |         |         | -      | 0.0003  | 0.0013  | 0.0003  | -0.0057 | 0.0001  | n.a. | n.a. |
| Csng    |         |         |        | -       | -0.0096 | -0.0059 | -0.0113 | -0.0039 | n.a. | n.a. |
| Csnd    |         |         |        |         | -       | -0.0096 | 0.0580  | -0.0053 | n.a. | n.a. |
| Odam    |         |         |        |         |         | -       | 0.0268  | -0.0039 | n.a. | n.a. |
| Csnk    |         |         |        |         |         |         | -       | -0.0058 | n.a. | n.a. |
| Lalba   |         |         |        |         |         |         |         | -       | n.a. | n.a. |
| WAP     |         |         |        |         |         |         |         |         | -    | n.a. |
| Elf5    |         |         |        |         |         |         |         |         |      | -    |

n.a., not analyzed.
